# Supplementary material for: Subcortical serotonin 5HT2c receptor-containing neurons sex-specifically regulate binge-like alcohol consumption, social, and arousal behaviors in mice
Source: Springer Nature journal article supplement (doi:10.1038/s41467-023-36808-2), 2023-03-31
Supplement: MOESM1 [file 41467_2023_36808_MOESM1_ESM.pdf]

## Supplementary Information

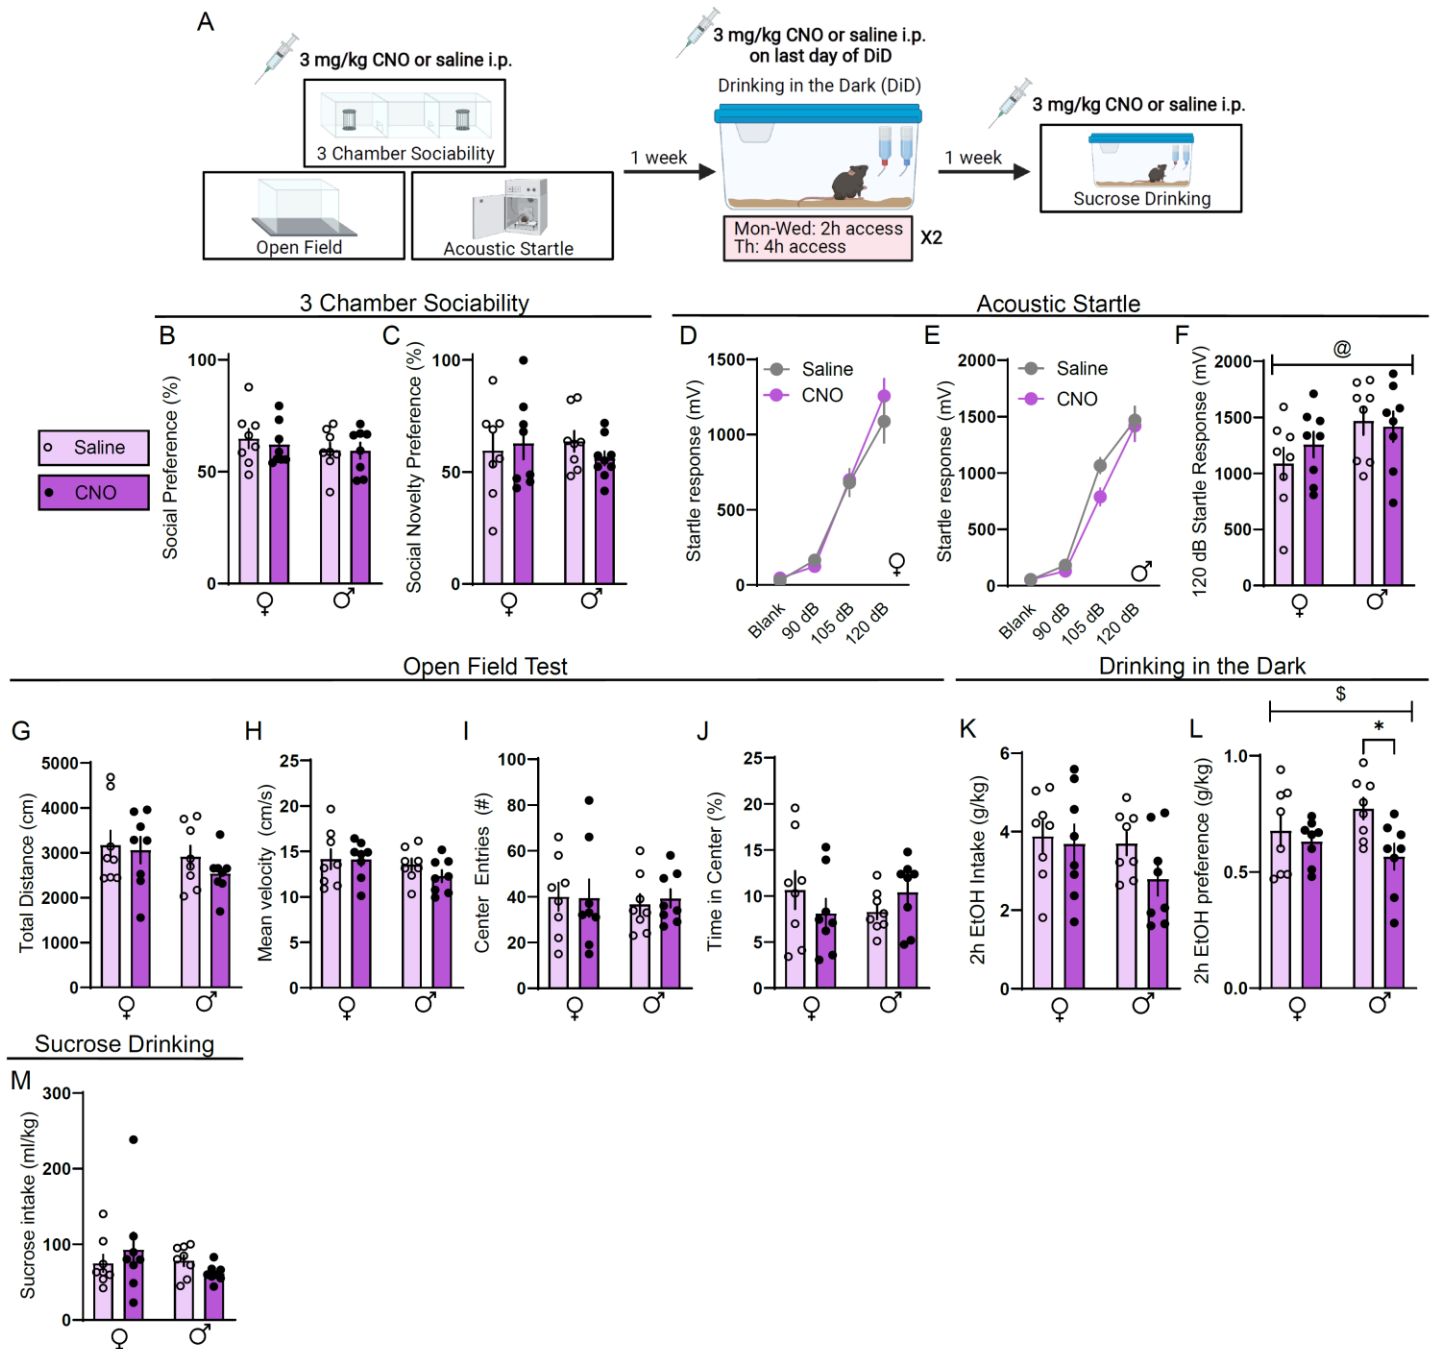

**Figure S1 (accompanies Figure 3): Systemic CNO treatment effects on behavior in wild-type mice. A,** Experimental timeline for CNO vs. vehicle studies. **B,** Social preference in the 3-chamber sociability test. **C,** Social novelty preference in 3-chamber sociability test. **D,** Acoustic startle behavior, females, two-way repeated measures ANOVA (10 trials/dB). **E,** Acoustic startle behavior, males (10 trials/dB), two-way repeated measures ANOVA. **F,** Acoustic startle behavior, 120 dB only (10 trials). **G,** Total distance in open field. **H,** Mean velocity in open field. **I,** Center entries in the open field. **J,** Time spent in center of open field. **K,** Alcohol intake in DiD. **L,** Alcohol preference in DiD. **M,** Sucrose consumption. For all panels,  $n=8$  mice/group. Unless otherwise stated, statistical comparisons performed using two-way ANOVA followed by Holm-Sidak's post-hoc. All data are

presented as mean  $\pm$  SEM. \$ denotes effect of DiD, @ denotes effect of sex, \* denotes post-hoc  $p < 0.05$ . Source data are provided as a Source Data file. Created with Biorender.com.

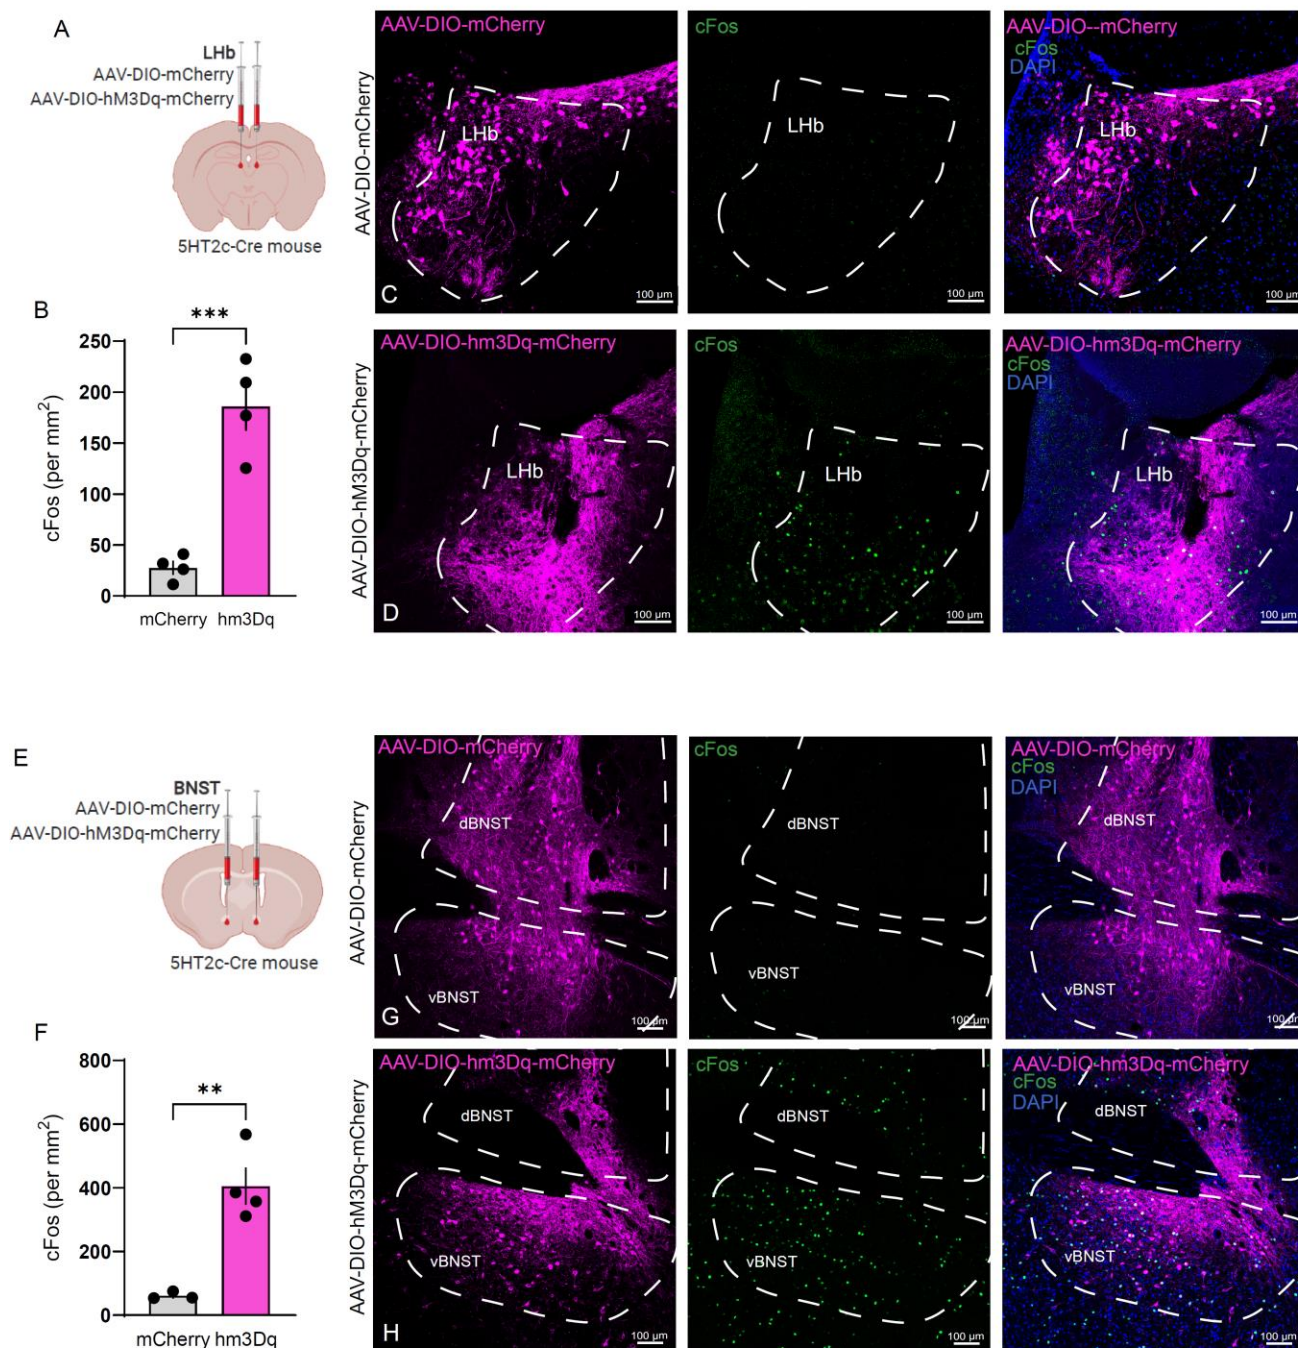

**Figure S2 (accompanies Figure 3): *In-vivo* validation of chemogenetic activation approach.** **A**, Surgical schematic for chemogenetic activation of LHB<sub>5HT2c</sub> neurons. **B**, Quantification of c-Fos following systemic CNO administration. **C**, Representative viral infection (left), c-Fos (middle), and composite (right) for AAV-DIO-mCherry LHB condition. Similar images were obtained in  $n=4$  mice. **D**, Representative viral infection (left), c-Fos (middle), and composite (right) for AAV-DIO-hm3Dq-mCherry LHB condition. Similar images were obtained in  $n=4$  mice. **E**, Surgical schematic for chemogenetic activation of BNST<sub>5HT2c</sub> neurons. **F**, Quantification of c-Fos following systemic CNO administration. **G**, Representative viral infection (left), c-Fos (middle), and composite (right) for AAV-DIO-mCherry BNST condition. Similar images were obtained in  $n=3$  mice. **H**, Representative viral

infection (left), c-Fos (middle), and composite (right) for AAV-DIO-hm3Dq-mCherry BNST condition. Similar images were obtained in n=4 mice. For LHb, mCherry n=3 mice/2 slices per mouse, hm3Dq n=4 mice/2 slices per mouse. For BNST, mCherry n=3 mice/2 slices per mouse, hm3Dq n=4 mice/2 slices per mouse. Statistical comparisons were performed using two-tailed *Student's* unpaired t-tests. All data presented as mean  $\pm$  SEM. \*\*p>0.01, \*\*\*p<0.001. Source data are provided as a Source Data file. Created with Biorender.com.

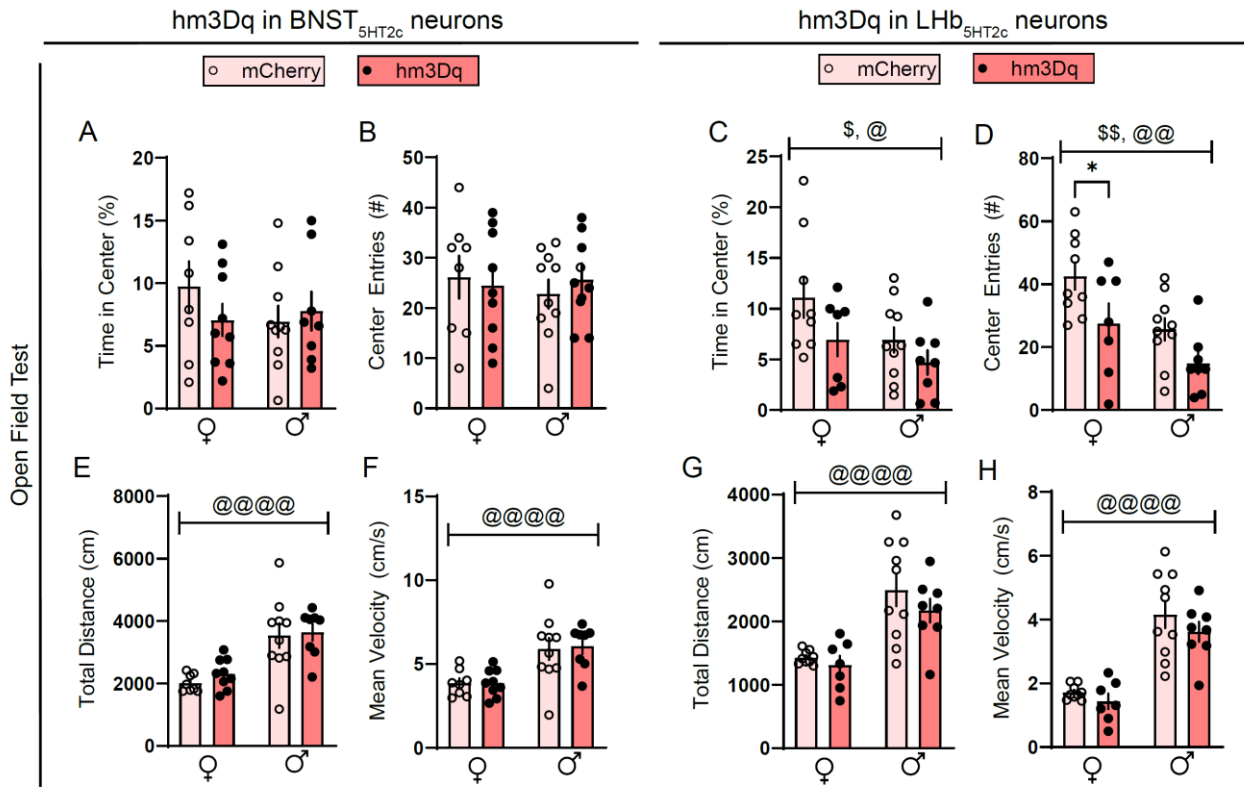

**Figure S3 (accompanies Figure 3): Effects of chemogenetic activation of LHB<sub>5HT2c</sub> or BNST<sub>5HT2c</sub> neurons on open field behavior.** **A**, Time in center of open field for BNST<sub>5HT2c</sub> activation. **B**, Center entries in the open field BNST<sub>5HT2c</sub> activation. **C**, Time in center of open field for LHB<sub>5HT2c</sub> activation. **D**, Entries in center of open field for LHB<sub>5HT2c</sub> activation. **E**, Total distance in open field for BNST<sub>5HT2c</sub> activation. **F**, Mean velocity in open field for BNST<sub>5HT2c</sub> activation. **G**, Total distance in open field for LHB<sub>5HT2c</sub> activation. **H**, Mean velocity in open field for LHB<sub>5HT2c</sub> activation. BNST, Females: mcherry n=8 mice, hm3Dq n=9 mice; Males: mCherry n=10 mice, hm3Dq n=8 mice. LHB, Females: mCherry n=9 mice, hm3Dq n=7 mice; Males: mCherry n=9 mice, hm3Dq n=8 mice. Statistical comparisons were performed using two-way ANOVA followed by Holm-Sidak's post-hoc. All data presented as mean  $\pm$  SEM. \$ denotes effect of virus ( $p < 0.05$ ,  $$$$p < 0.01$ ), @ denotes effect of sex (@  $p < 0.05$ , @@  $p < 0.01$ , @@@  $p < 0.001$ , @@@@  $p < 0.0001$ ), and \*denote post-hoc  $p < 0.05$ . Source data are provided as a Source Data file.

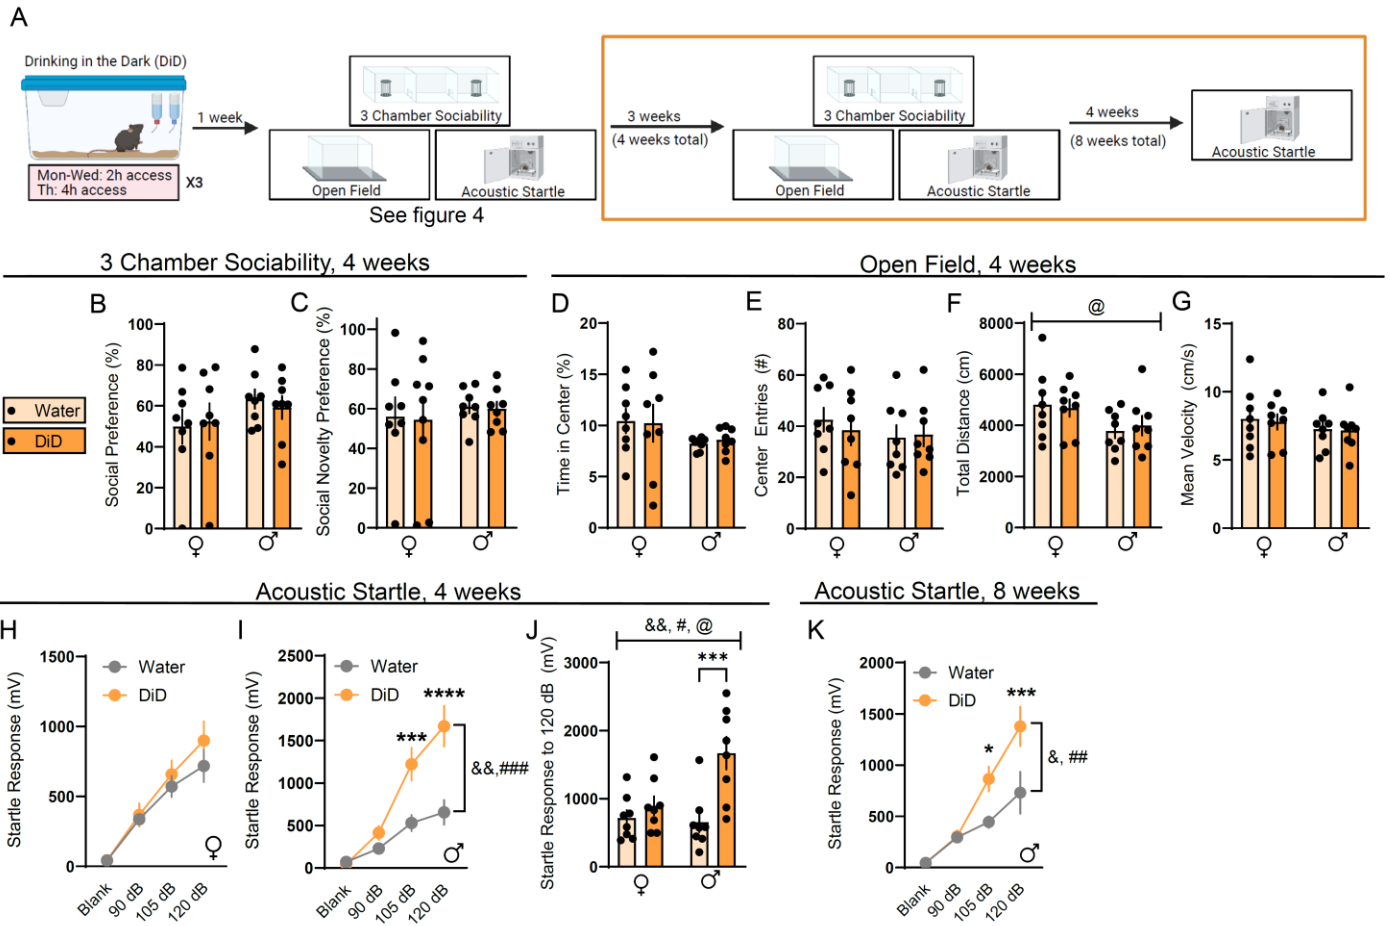

**Figure S4 (accompanies Figure 4): DiD induces long-lasting changes in male acoustic startle behavior.**

**A**, Experimental timeline for investigating effects of DiD on affective behaviors. This figure is specifically showing behaviors at the time points in the orange box. **B**, Social preference in 3-chamber sociability test. **C**, Social novelty preference in the 3-chamber sociability test. **D**, Time in center of open field. **E**, Center entries in open field. **F**, Total distance in open field. **G**, Mean velocity in an open field. **H**, Acoustic startle behavior at four weeks, females, two-way repeated measures ANOVA. **I**, Acoustic startle behavior at 4 weeks, males, two-way repeated measures ANOVA followed by Holm-Sidak's post-hoc. **J**, Acoustic startle behavior at four weeks, 120 dB only. **K**, Acoustic startle behavior at 8 weeks, males, two-way repeated measures ANOVA followed by Holm-Sidak's post-hoc. Females: water n=8 mice, DiD n=8 mice; Males: water n=8 mice, DiD n=8 mice. Unless otherwise stated, statistical comparisons were performed using two-way ANOVAs followed by Holm-Sidak's post-hoc. All data are represented as mean  $\pm$  SEM. & denotes effects of DiD, @ denotes effect of sex, # denotes interaction, \*denote post-hoc effects. Source data are provided as a Source Data file. Created with Biorender.com.



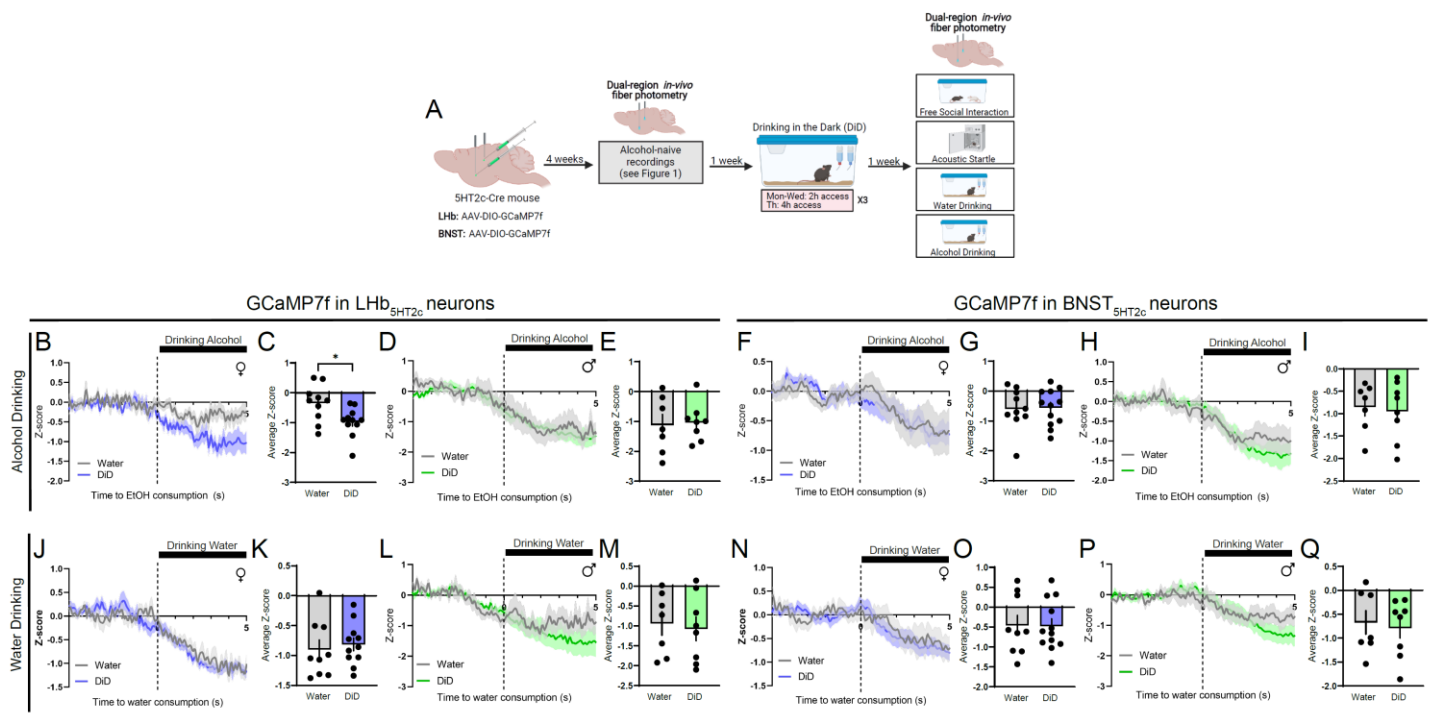

**Figure S5 (accompanies Figure 6): DiD alters calcium (GCaMP) responses of Lhb<sub>5HT2c</sub> neurons in females.** **A**, Surgical schematic and experimental timeline for Lhb<sub>5HT2c</sub> and BNST<sub>5HT2c</sub> GCaMP recordings. **B**, Peri-event plot of Lhb<sub>5HT2c</sub> GCaMP activity during alcohol drinking, females (water n=10 mice/1-4 bouts; DiD n=11 mice/1-4 bouts). **C**, Average z-score of Lhb<sub>5HT2c</sub> GCaMP activity for 0-5s post bout start, females (water n=10 mice/1-4 bouts; DiD n=11 mice/1-4 bouts). **D**, Peri-event plot of Lhb<sub>5HT2c</sub> GCaMP activity during alcohol drinking, males (water n=8 mice/1-4 bouts, DiD=10 mice/1-4 bouts). **E**, Average z-score of Lhb<sub>5HT2c</sub> GCaMP signal for 0-5s post bout start, males (water n=8 mice/1-4 bouts, DiD=10 mice/1-4 bouts). **F**, Peri-event plot of BNST<sub>5HT2c</sub> GCaMP activity during alcohol drinking, females (water n=10 mice/1-4 bouts; DiD n=12 mice/1-4 bouts). **G**, Average z-score of BNST<sub>5HT2c</sub> GCaMP signal for 0-5s post bout start, females (water n=10 mice/1-4 bouts; DiD n=12 mice/1-4 bouts). **H**, Peri-event plot of BNST<sub>5HT2c</sub> GCaMP signal during alcohol drinking, males (water n=7 mice/1-4 bouts; DiD n=8 mice/1-4 bouts). **I**, Average z-score of BNST<sub>5HT2c</sub> GCaMP signal for 0-5s post bout start, males (water n=7 mice/1-4 bouts; DiD n=8 mice/1-4 bouts). **J**, Peri-event plot of Lhb<sub>5HT2c</sub> GCaMP activity during water drinking, females (water n=9 mice/1-4 bouts; DiD n=11 mice/1-4 bouts). **K**, Average z-score of Lhb<sub>5HT2c</sub> signal for 0-5s post bout start, females (water n=9 mice/1-4 bouts; DiD n=11 mice/1-4 bouts). **L**, Peri-event plot of Lhb<sub>5HT2c</sub> GCaMP activity during water drinking, males (water n=7 mice/1-4 bouts; DiD n=8 mice/1-4 bouts). **M**, Average z-score of Lhb<sub>5HT2c</sub> GCaMP signal for 0-5s post bout start, males (water n=7 mice/1-4 bouts; DiD n=8 mice/1-4 bouts). **N**, Peri-event plot of BNST<sub>5HT2c</sub> GCaMP activity during water drinking, females (water n=9 mice/1-4 bouts; DiD n=12 mice/1-4 bouts). **O**, Average z-score of BNST<sub>5HT2c</sub> GCaMP signal for 0-5s post bout start (water n=9 mice/1-4 bouts; DiD n=12 mice/1-4 bouts). **P**, Peri-event plot of BNST<sub>5HT2c</sub> GCaMP activity during water drinking, males (water n=7 mice/1-4 bouts; DiD n=8 mice/1-4 bouts). **Q**, Average z-score of BNST<sub>5HT2c</sub> GCaMP signal for 0-5s post bout start. Statistical comparisons were performed using two-tailed *Student's* unpaired t-tests. All data are presented as mean  $\pm$  SEM. \*p<0.05. Source data are provided as a Source Data file. Created with Biorender.com.

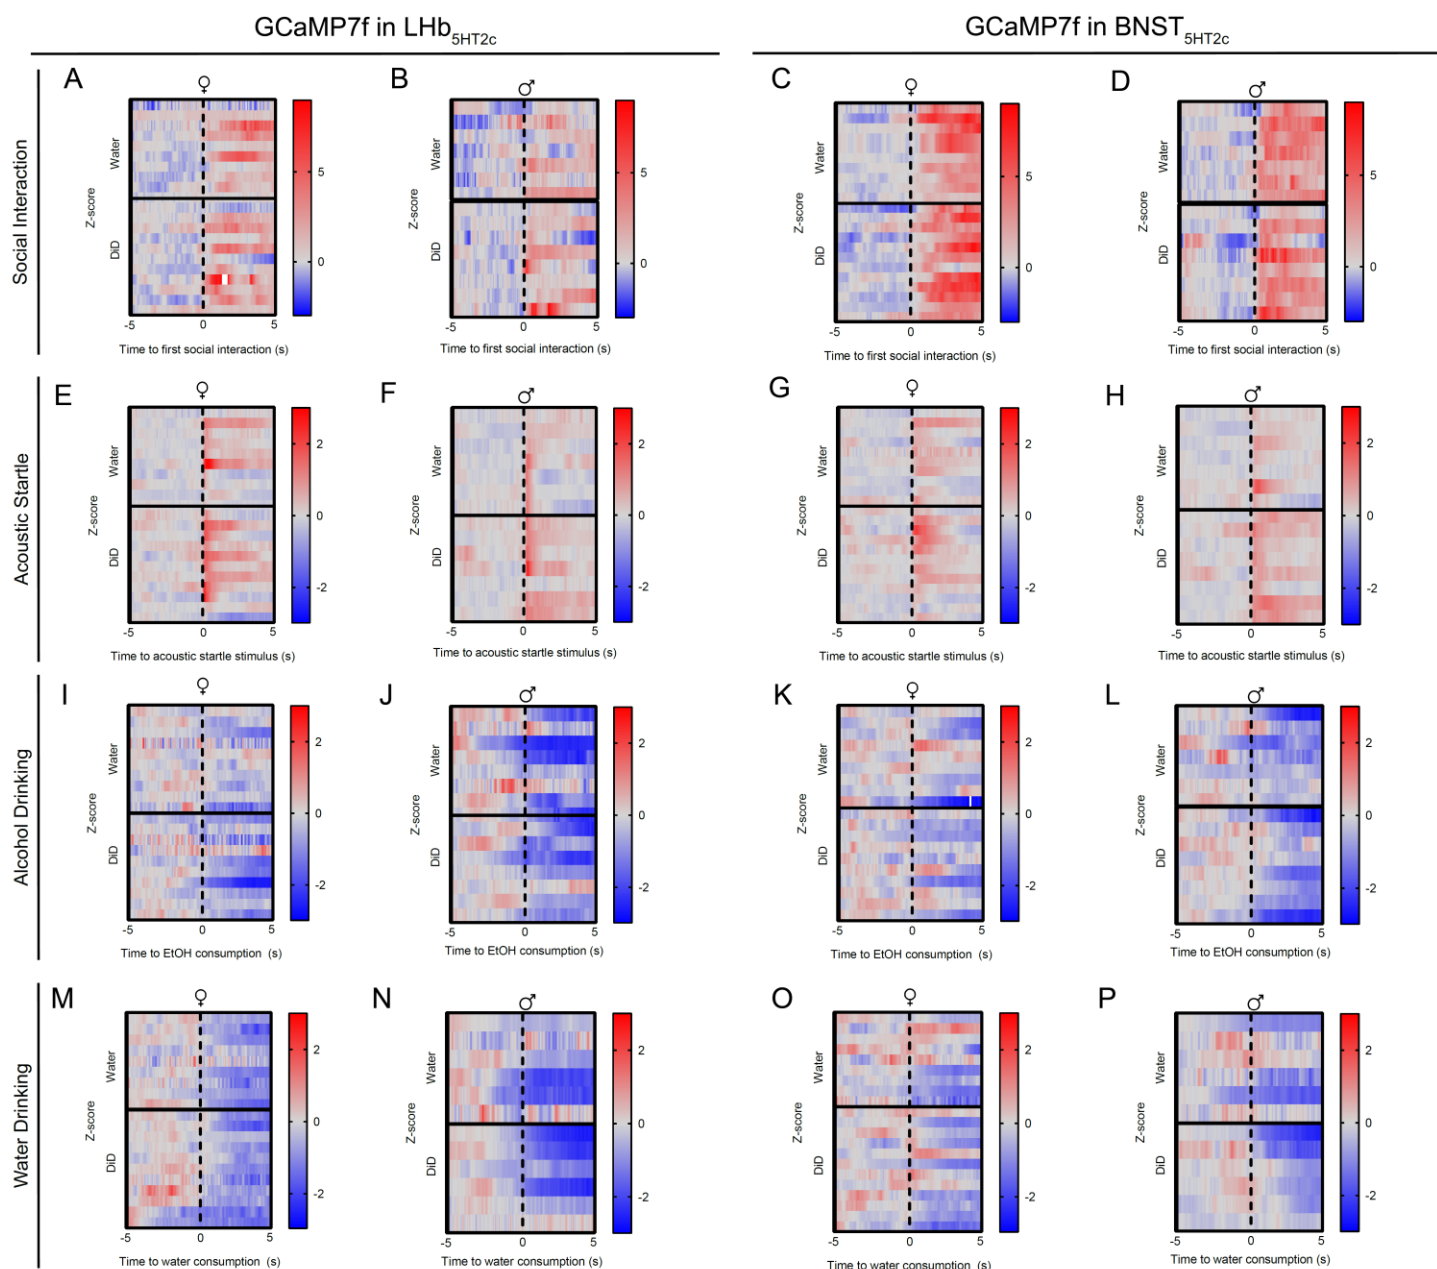

**Figure S6 (accompanies Figure 7): Individual animal responses for GCaMP7f experiments.** **A**, Free social interaction, LHb<sub>5HT2c</sub> females. **B**, Free social interaction, LHb<sub>5HT2c</sub> males. **C**, Free social interaction, BNST<sub>5HT2c</sub> females. **D**, Free social interaction, BNST<sub>5HT2c</sub> males. **E**, Acoustic startle, LHb<sub>5HT2c</sub> females. **F**, Acoustic startle, LHb<sub>5HT2c</sub> males. **G**, Acoustic startle, BNST<sub>5HT2c</sub> females. **H**, Acoustic startle, BNST<sub>5HT2c</sub> males. **I**, Alcohol drinking, LHb<sub>5HT2c</sub> females. **J**, Alcohol drinking, LHb<sub>5HT2c</sub> males. **K**, Alcohol drinking, BNST<sub>5HT2c</sub> females. **L**, Alcohol drinking, BNST<sub>5HT2c</sub> males. **M**, Water drinking, LHb<sub>5HT2c</sub> females. **N**, Water drinking, LHb<sub>5HT2c</sub> males. **O**, Water drinking, BNST<sub>5HT2c</sub> males. **P**, Water drinking, BNST<sub>5HT2c</sub> males. Each horizontal line in the heatmap corresponds to the average of all trials for a single animal. Source data are provided as a Source Data file.

## Acoustic Startle Test in DiD and Water Males

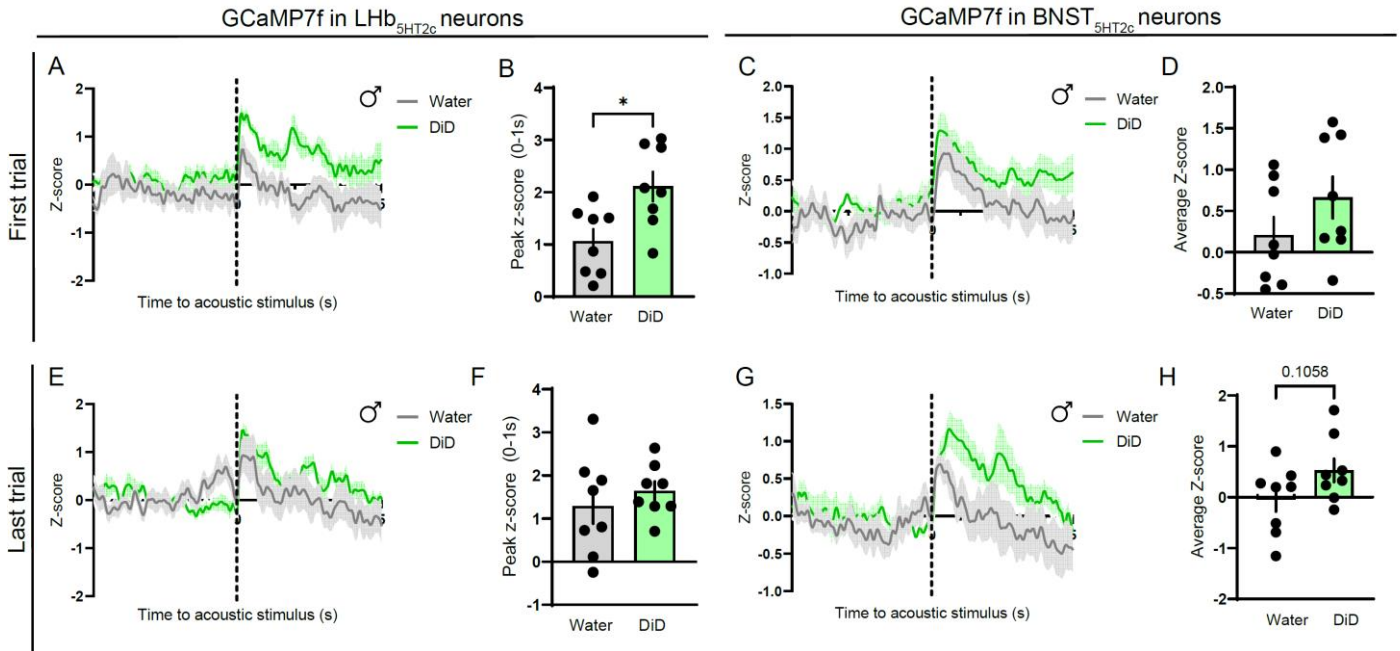

**Figure S7 (accompanies Figure 7): 5HT2c-containing neurons alter their responses to stimuli over time.**

**A**, Peri-event plot of first startle trial, LHB<sub>5HT2c</sub> GCaMP DiD vs. Water males. **B**, Peak z-score of first startle trial for 0-1s post startle stimulus, LHB<sub>5HT2c</sub> GCaMP DiD vs. Water males. **C**, Peri-event plot of first startle trial, BNST<sub>5HT2c</sub> GCaMP DiD vs. Water males. **D**, Average z-score of first startle trial, BNST<sub>5HT2c</sub> GCaMP DiD vs. Water males for 0-5s post startle stimulus. **E**, Peri-event plot of last startle trial, LHB<sub>5HT2c</sub> GCaMP DiD vs. Water males. **F**, Peak z-score of last startle trial, LHB<sub>5HT2c</sub> GCaMP DiD vs. Water males for 0-1s post startle stimulus. **G**, Peri-event plot of last startle trial, BNST<sub>5HT2c</sub> GCaMP DiD vs. Water males. **H**, Average z-score of last startle trial, BNST<sub>5HT2c</sub> GCaMP DiD vs. Water males for 0-5s post startle stimulus. For all panels, water n=8 mice/1 trial, DiD n=8 mice/1 trial. Statistical comparisons were performed using two-tailed *Student's* unpaired t-tests. All data presented as mean ± SEM. \*p<0.05. Source data are provided as a Source Data file.



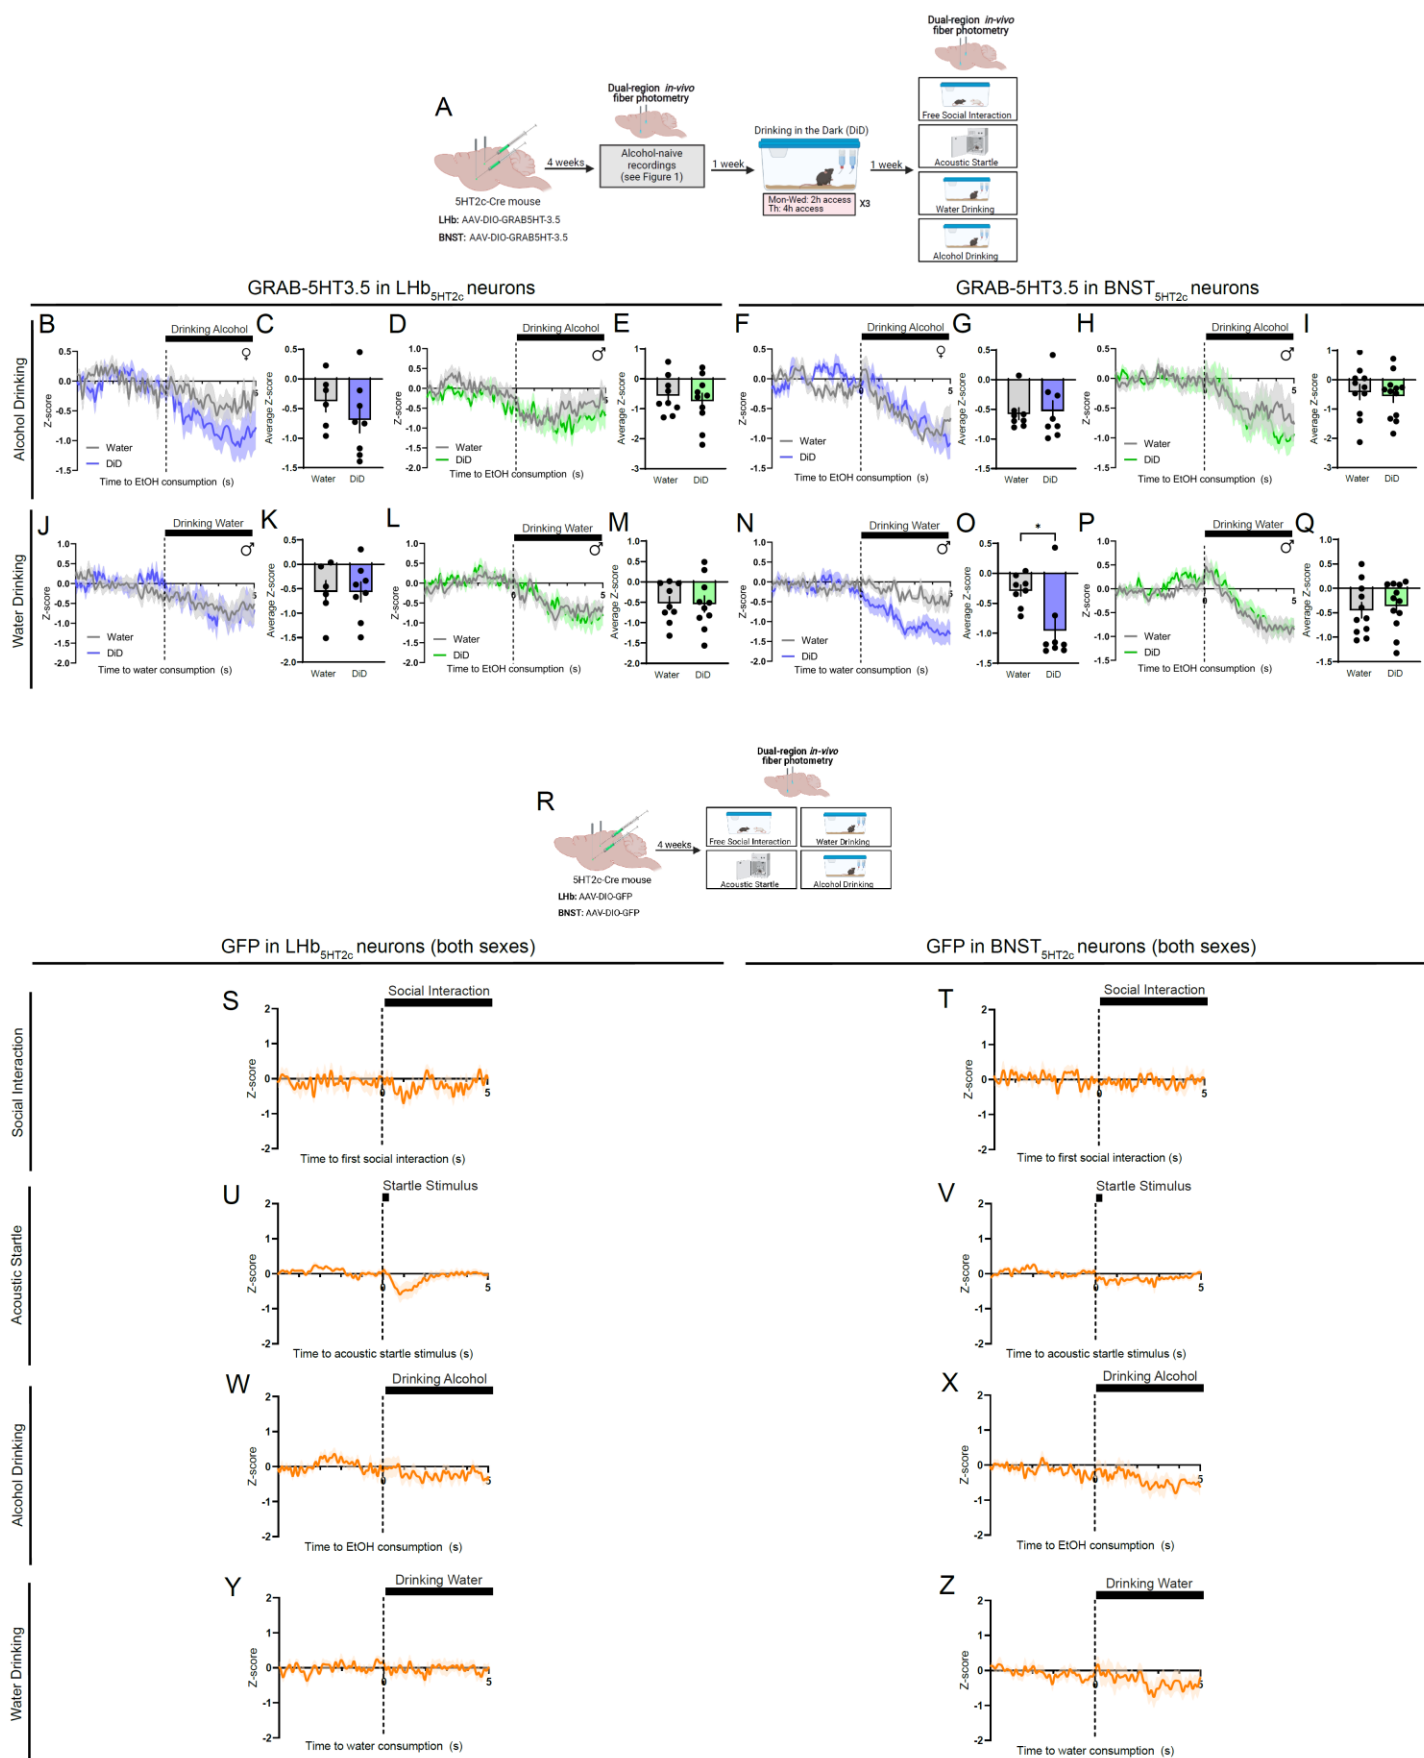

**Figure S8 (accompanies Figure 8): DiD alters 5-HT release onto BNST<sub>5HT2c</sub> neurons in females during water drinking; GFP motion controls.** **A**, Surgical schematic and experimental timeline for Lhb<sub>5HT2c</sub> and BNST<sub>5HT2c</sub> GRAB-5HT recordings. **B**, Peri-event plot of Lhb<sub>5HT2c</sub> GRAB-5HT activity during alcohol drinking, females (water n=6 mice/1-4 bouts; DiD n=8 mice/1-4 bouts). **C**, Average z-score of Lhb<sub>5HT2c</sub> GRAB-5HT activity for 0-5s post bout start, females (water n=6 mice/1-4 bouts; DiD n=8 mice/1-4 bouts). **D**, Peri-event plot of Lhb<sub>5HT2c</sub> GRAB-5HT activity during alcohol drinking, males (water n=9 mice/1-4 bouts; DiD n=10 mice/1-4 bouts). **E**, Average z-score of Lhb<sub>5HT2c</sub> GRAB-5HT signal for 0-5s post bout start, males (water n=9 mice/1-4 bouts; DiD n=10 mice/1-4 bouts). **F**, Peri-event plot of BNST<sub>5HT2c</sub> GRAB-5HT activity during alcohol drinking, females (water n=8 mice/1-4 bouts; DiD n=8 mice/1-4 bouts). **G**, Average z-score of BNST<sub>5HT2c</sub> GRAB-5HT signal for 0-5s post bout start, females (water n=8 mice/1-4 bouts; DiD n=8 mice/1-4 bouts). **H**, Peri-event plot of BNST<sub>5HT2c</sub> GRAB-5HT signal during alcohol drinking, males (water n=11 mice/1-4 bouts; DiD n=12 mice/1-4 bouts). **I**, Average z-score of BNST<sub>5HT2c</sub> GRAB-5HT signal for 0-5s post bout start, males (water n=11 mice/1-4 bouts; DiD n=12 mice/1-4 bouts). **J**, Peri-event plot of Lhb<sub>5HT2c</sub> GRAB-5HT activity during water drinking, females (water n=6 mice/1-4 bouts; DiD n=8 mice/1-4 bouts). **K**, Average z-score of Lhb<sub>5HT2c</sub> signal for 0-5s post bout start, females (water n=6 mice/1-4 bouts; DiD n=8 mice/1-4 bouts). **L**, Peri-event plot of Lhb<sub>5HT2c</sub> GRAB-5HT activity during water drinking, males (water n=9 mice/1-4 bouts; DiD n=10 mice/1-4 bouts). **M**, Average z-score of Lhb<sub>5HT2c</sub> GRAB-5HT signal for 0-5s post bout start, males (water n=9 mice/1-4 bouts; DiD n=10 mice/1-4 bouts). **N**, Peri-event plot of BNST<sub>5HT2c</sub> GRAB-5HT activity during water drinking, females (water n=8 mice/1-4 bouts; DiD n=8 mice/1-4 bouts). **O**, Average z-score of BNST<sub>5HT2c</sub> GRAB-5HT signal for 0-5s post bout start (water n=8 mice/1-4 bouts; DiD n=8 mice/1-4 bouts). **P**, Peri-event plot of BNST<sub>5HT2c</sub> GRAB-5HT activity during water drinking, males (water n=11 mice/1-4 bouts; DiD n=12 mice/1-4 bouts). **Q**, Average z-score of BNST<sub>5HT2c</sub> GRAB-5HT signal for 0-5s post bout start (water n=11 mice/1-4 bouts; DiD n=12 mice/1-4 bouts). **R**, Surgical schematic and experimental timeline for Lhb<sub>5HT2c</sub> and BNST<sub>5HT2c</sub> GFP control photometry experiments. **S**, Peri-event plot of Lhb<sub>5HT2c</sub> GFP signal during free social interaction (n=9 mice, 1 trial/mouse). **T**, Peri-event plot of BNST<sub>5HT2c</sub> GFP signal during free social interaction (n=9 mice, 1 trial/mouse). **U**, Peri-event plot of Lhb<sub>5HT2c</sub> GFP signal during the acoustic startle test (n=9 mice, average of 10 trials/mouse). **V**, Peri-event plot of BNST<sub>5HT2c</sub> GFP signal during the acoustic startle test (n=9 mice, average of 10 trials/mouse). **W**, Peri-event plot of Lhb<sub>5HT2c</sub> GFP signal during voluntary alcohol drinking (n=9 mice, average of 1-3 bouts/mouse). **X**, Peri-event plot of BNST<sub>5HT2c</sub> GFP signal during voluntary alcohol consumption (n=9 mice, average of 1-4 bouts/mouse). **Y**, Peri-event plot of Lhb<sub>5HT2c</sub> GFP signal during voluntary water drinking (n=9 mice, average of 1-4 bouts/mouse). **Z**, Peri-event plot of BNST<sub>5HT2c</sub> GFP signal during voluntary water drinking (n=9 mice, average of 1-4 bouts/mouse). Statistical comparisons were performed using two-tailed *Student's* unpaired t-tests. All data are presented as mean  $\pm$  SEM. \*p<0.05. Source data are provided as a Source Data file. Created with Biorender.com.

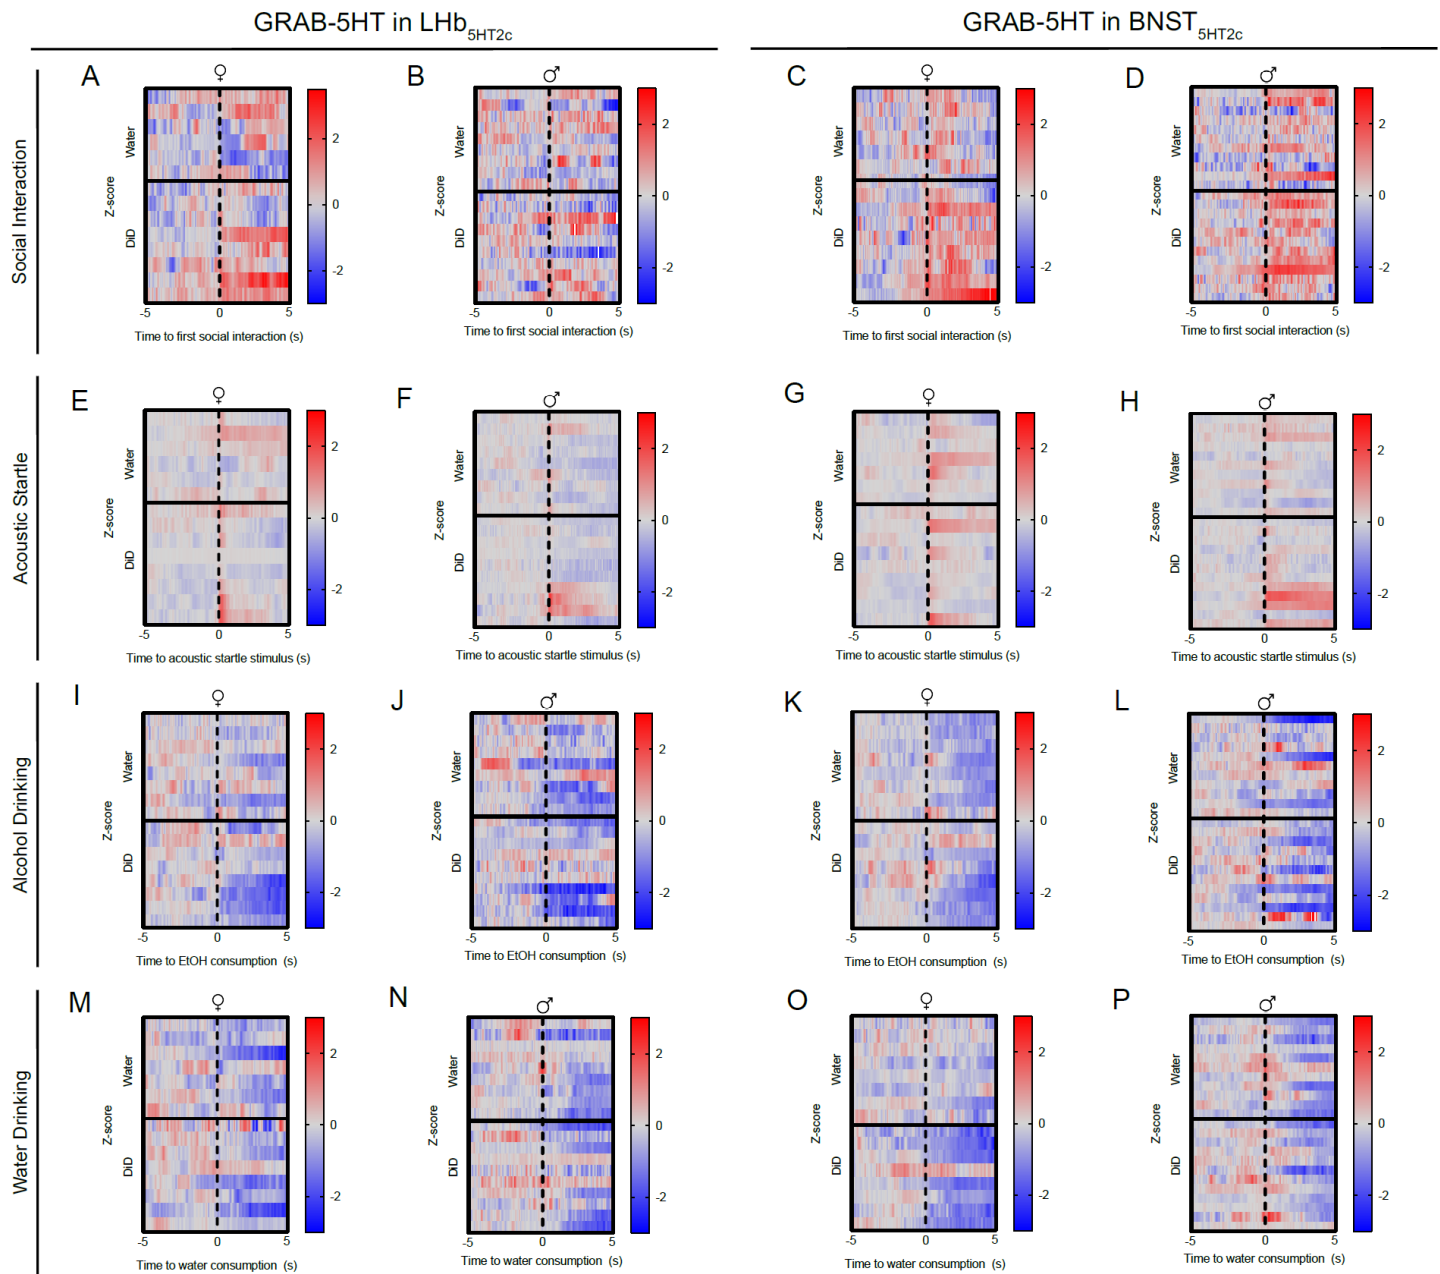

**Figure S9 (accompanies Figure 8): Individual animal responses for GRAB-5HT experiments.** **A**, Free social interaction, Lhb<sub>5HT2c</sub> females. **B**, Free social interaction, Lhb<sub>5HT2c</sub> males. **C**, Free social interaction, BNST<sub>5HT2c</sub> females. **D**, Free social interaction, BNST<sub>5HT2c</sub> males. **E**, Acoustic startle, Lhb<sub>5HT2c</sub> females. **F**, Acoustic startle, Lhb<sub>5HT2c</sub> males. **G**, Acoustic startle, BNST<sub>5HT2c</sub> females. **H**, Acoustic startle, BNST<sub>5HT2c</sub> males. **I**, Alcohol drinking, Lhb<sub>5HT2c</sub> females. **J**, Alcohol drinking, Lhb<sub>5HT2c</sub> males. **K**, Alcohol drinking, BNST<sub>5HT2c</sub> females. **L**, Alcohol drinking, BNST<sub>5HT2c</sub> males. **M**, Water drinking, Lhb<sub>5HT2c</sub> females. **N**, Water drinking, Lhb<sub>5HT2c</sub> males. **O**, Water drinking, BNST<sub>5HT2c</sub> females. **P**, Water drinking, BNST<sub>5HT2c</sub> males. Each horizontal line in the heatmap corresponds to the average of all trials for a single animal.

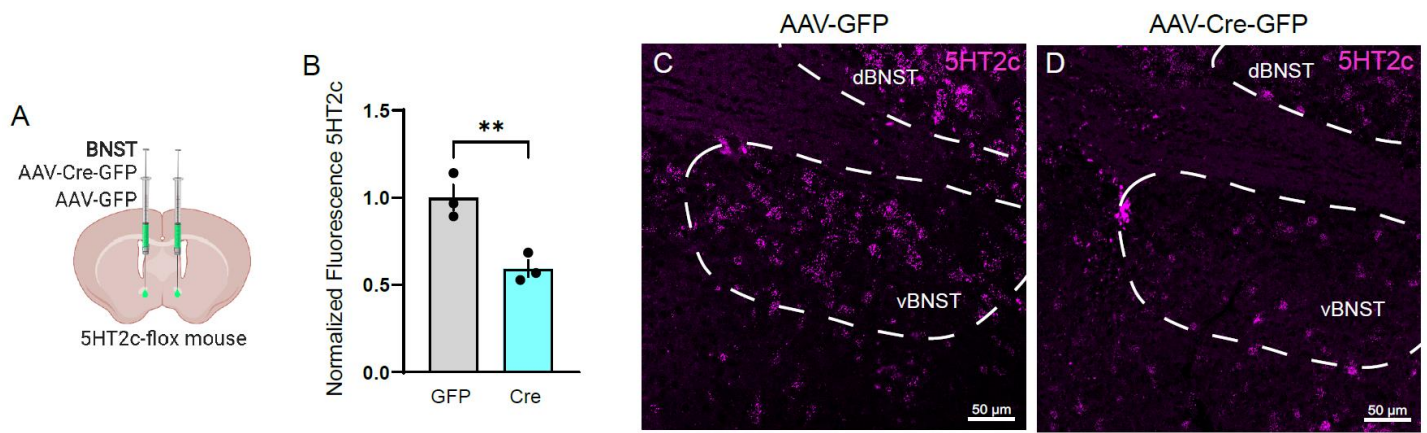

**Figure S10 (accompanies Figure 9): Validation of 5HT<sub>2c</sub> knockdown in our 5HT<sub>2c</sub><sup>lox/lox</sup> mouse.** **A**, Surgical schematic for 5HT<sub>2c</sub> knockdown. **B**, Quantification of 5HT<sub>2c</sub> fluorescence. **C**, Representative 5HT<sub>2c</sub> fluorescence in AAV-GFP condition. Similar images were obtained in n=3 mice. **D**, Representative 5HT<sub>2c</sub> fluorescence in AAV-Cre-GFP condition. Similar images were obtained in n=3 mice. GFP: n=3 mice/2 slices per mouse; Cre: n=3 mice/2 slices per mouse. Statistical comparisons were performed using two-tailed *Student's* unpaired t-test. All data presented as mean ± SEM. \*\*p<0.01. Source data are provided as a Source Data file. Created with Biorender.com.

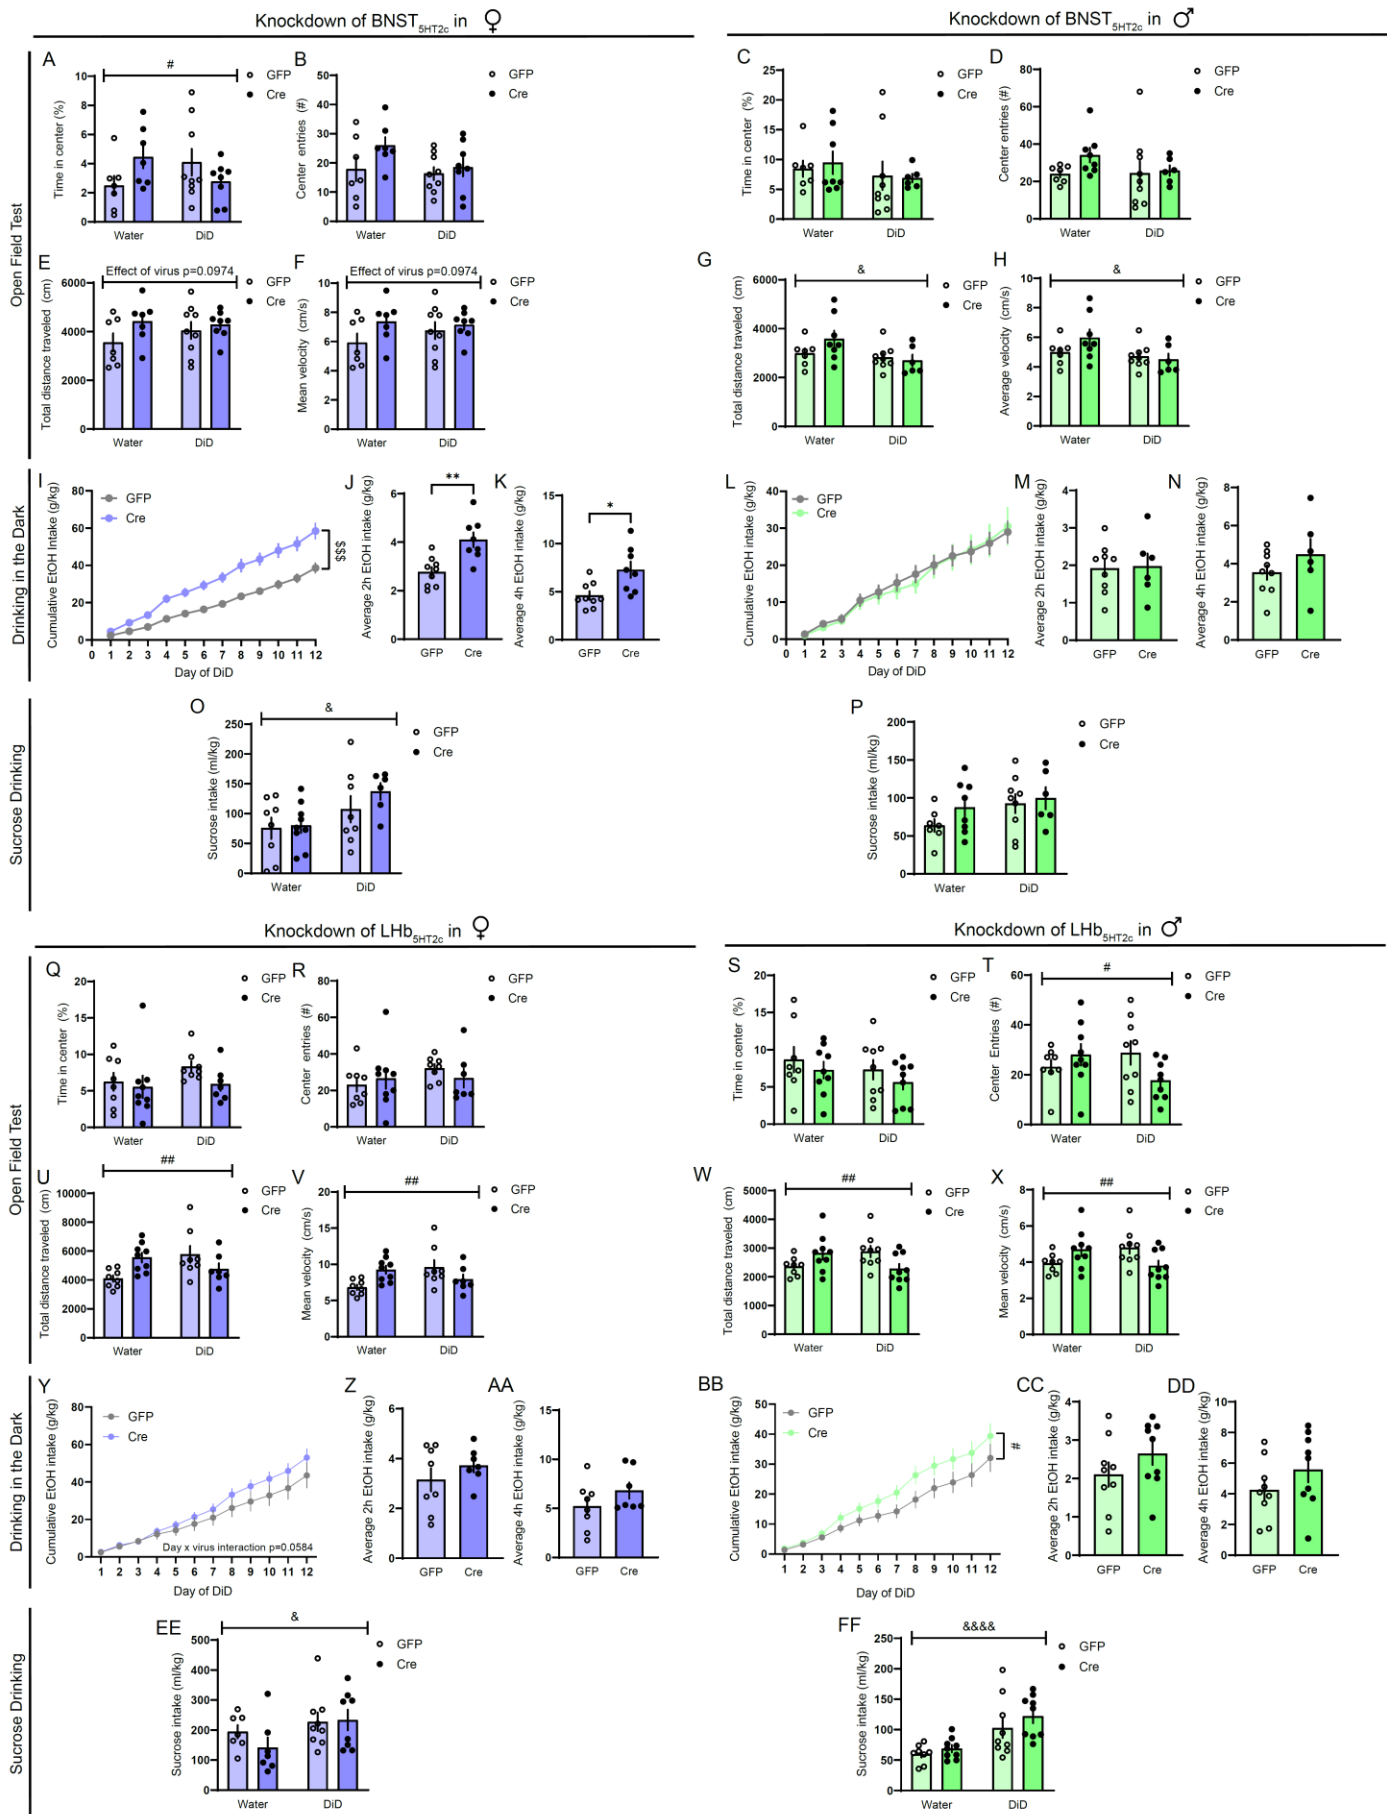



**Figure S11 (accompanies Figure 9): Effects of 5HT<sub>2c</sub> knockdown on open field behavior, DiD, and sucrose consumption.** **A**, Time in center of open field, BNST females. **B**, Center entries in open field, BNST females. **C**, Time in center of open field, BNST males. **D**, Center entries in open field, BNST males. **E**, Total distance in open field, BNST females. **F**, Mean velocity in open field, BNST females. **G**, Total distance in open field, BNST males. **H**, Mean velocity in open field, BNST males. **I**, Cumulative alcohol consumption in DiD, BNST females, two-way repeated measures ANOVA. **J**, Average 2h alcohol intake in DiD, BNST females. **K**, Average 4h alcohol intake in DiD, BNST females. **L**, Cumulative alcohol consumption in DiD, BNST males, two-way repeated measures ANOVA. **M**, Average 2h alcohol intake in DiD, BNST males. **N**, Average 4h alcohol intake in DiD, BNST males. **O**, Sucrose intake, BNST females. **P**, Sucrose intake, BNST males. **Q**, Time in center of open field, LHb females. **R**, Center entries in open field, LHb females. **S**, Time in center of open field, LHb males. **T**, Center entries in open field, LHb males. **U**, Total distance in open field, LHb females. **V**, Mean velocity in open field, LHb females. **W**, Total distance in open field, LHb males. **X**, Mean velocity in open field, LHb males. **Y**, Cumulative alcohol consumption in DiD, LHb females, two-way repeated measures ANOVA. **Z**, Average 2h alcohol intake in DiD, LHb females. **AA**, Average 4h alcohol intake in DiD, LHb females. **BB**, Cumulative alcohol consumption in DiD, LHb males, two-way repeated measures ANOVA. **CC**, Average 2h alcohol intake in DiD, males. **DD**, Average 4h alcohol intake in DiD, LHb males. **EE**, Sucrose intake, females. **FF**, Sucrose intake, males. BNST females, GFP: water n=7 mice, DiD n=9 mice; DiD water n=7 mice, DiD n=8 mice. BNST males, GFP: water n=7 mice, DiD n=9 mice; Cre: water n=8 mice, DiD n=6 mice. LHb females, GFP: water n=8 mice, DiD n=8 mice; Cre: water n=9 mice, DiD n=6 mice. LHb males, GFP: water n=8 mice, DiD n=9 mice; Cre: water n=9 mice, DiD n=9 mice. Unless otherwise stated, statistical comparisons between two or more groups were performed using two-way ANOVA followed by Holm-Sidak's post-hoc. Statistical comparisons between two groups were performed using two-tailed *Student's* unpaired t-tests. All data presented as mean  $\pm$  SEM. & denotes effect of DiD, \$ denotes effect of virus (\$p<0.05, \$\$p<0.01, \$\$\$p<0.0001), # denotes interaction (day x virus or DiD x virus) (#p<0.05, ##p<0.01), and \* denotes post-hoc p<0.05, \*\* p<0.01. Source data are provided as a Source Data file.

# Chemogenetic inhibition of BNST<sub>5HT2c</sub> in ♀

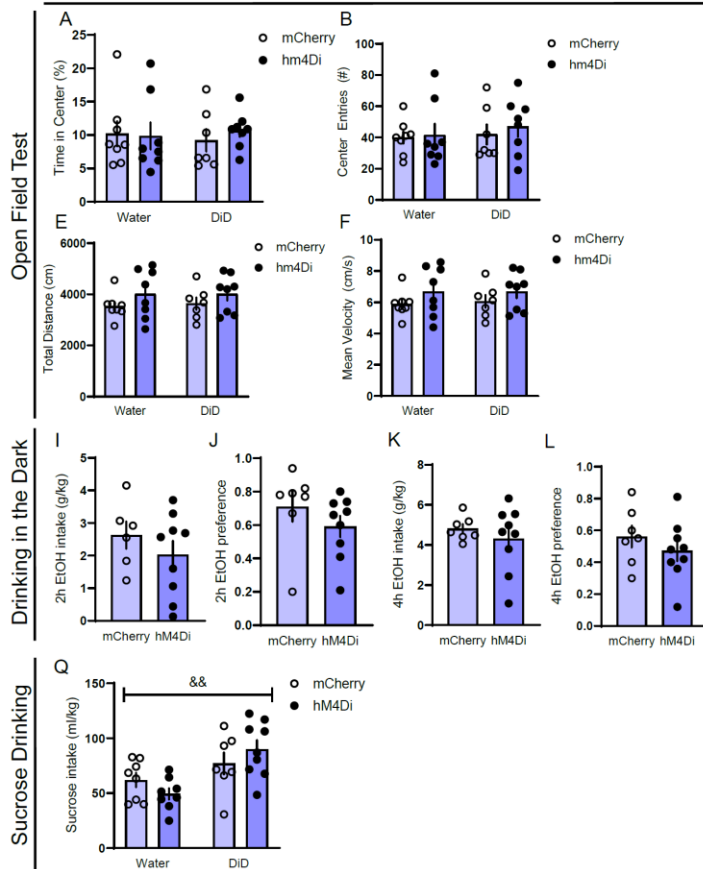

# Chemogenetic inhibition of BNST<sub>5HT2c</sub> in ♂

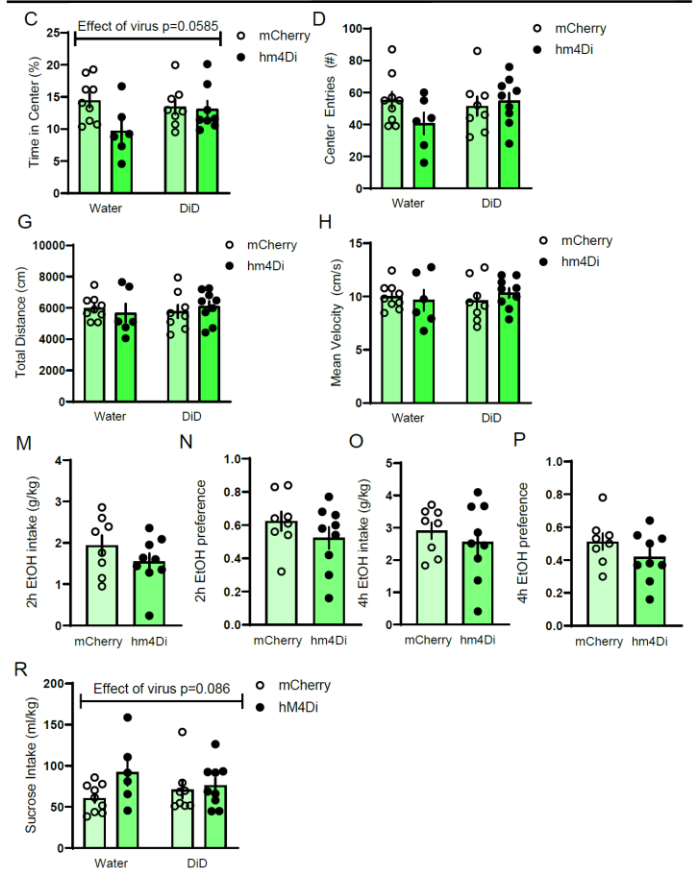

# Chemogenetic inhibition of LHb<sub>5HT2c</sub> in ♀

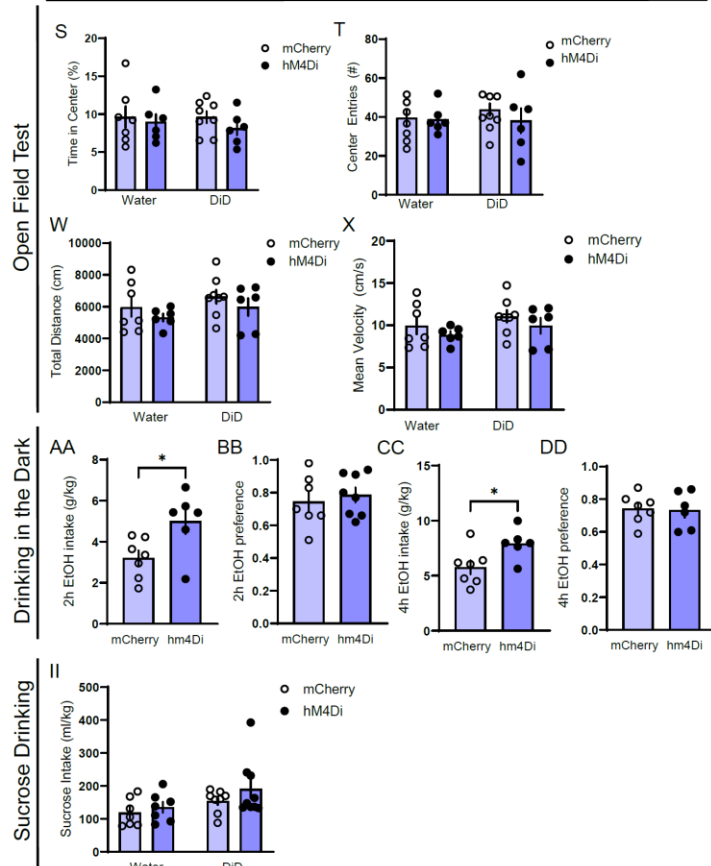

# Chemogenetic inhibition of LHb<sub>5HT2c</sub> in ♂

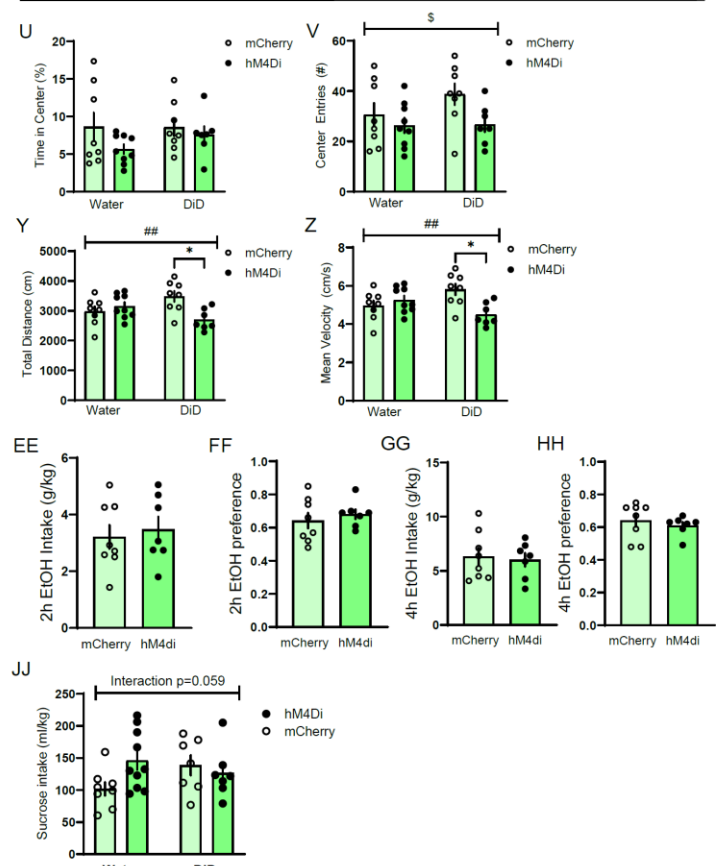

**Figure S12 (accompanies Figure 10): Effects of chemogenetic inhibition of LHb<sub>5HT2c</sub> and BNST<sub>5HT2c</sub> on open field behavior, DiD, and sucrose consumption.** **A**, Time in center of open field (%), BNST females. **B**, Center entries in open field, BNST females. **C**, Time in center of open field (%), BNST males. **D**, Center entries in open field, BNST males. **E**, Total distance traveled in open field, BNST females. **F**, Mean velocity in open field, BNST females. **G**, Total distance traveled in open field, BNST males. **H**, Mean velocity in open field, BNST males. **I**, 2 hr alcohol intake in DiD, BNST females. **J**, 2 hr alcohol preference in DiD, BNST females. **K**, 4h alcohol intake in DiD, BNST females. **L**, 4h alcohol preference in DiD, BNST females. **M**, 2h alcohol intake in DiD, BNST males. **N**, 2h alcohol preference in DiD, BNST males. **O**, 4h alcohol intake in DiD, BNST males. **P**, 4h alcohol preference in DiD, BNST males. **Q**, 4h sucrose intake, BNST females. **R**, 4h sucrose intake, BNST males. **S**, Time in center of open field (%), LHb females. **T**, Center entries to open field, LHb females. **U**, Time in center of open field (%), LHb males. **V**, Center entries to open field, LHb males. **W**, Total distance traveled in open field, LHb females. **X**, Mean velocity in open field, LHb females. **Y**, Total distance traveled in open field, LHb males. **Z**, Mean velocity in open field, LHb males. **AA**, 2h alcohol intake in DiD, LHb females. **BB**, 2h alcohol preference in DiD, LHb females. **CC**, 4h alcohol intake in DiD, LHb females. **DD**, 4h alcohol preference in DiD, LHb females. **EE**, 2h alcohol intake in DiD, LHb males. **FF**, 2h alcohol preference in DiD, LHb males. **GG**, 4h alcohol intake in DiD, LHb males. **HH**, 4h alcohol preference in DiD, LHb males. **II**, 4h sucrose intake, LHb females. **JJ**, 4h sucrose intake, LHb males. LHb females, mCherry: water n=7 mice, DiD n=8 mice; hM4Di: water n=6 mice, DiD n=6 mice. LHb males, mCherry: water n=8 mice, DiD n=8 mice; hM4Di: water n=9 mice, DiD n=7 mice. BNST females, mCherry: water n=8 mice, DiD n=7 mice; hM4Di: water n=8 mice, DiD n=9 mice. BNST males, mCherry: water n=9 mice, DiD n=8 mice; hM4Di water n=6 mice, DiD n=9 mice. Statistical comparisons between two or more groups were performed using two-way ANOVA followed by Holm-Sidak's post-hoc. Statistical comparisons between two groups were performed using two-tailed *Student's* unpaired t-tests. All data presented as mean  $\pm$  SEM. & denotes effect of DiD, # denotes interaction (#p<0.05, ##p<0.01), \$ denotes effect of virus (\$p<0.05, \$\$p<0.01), \* denotes post-hoc p<0.05, \*\* denotes post-hoc p<0.01. Source data are provided as a Source Data file.

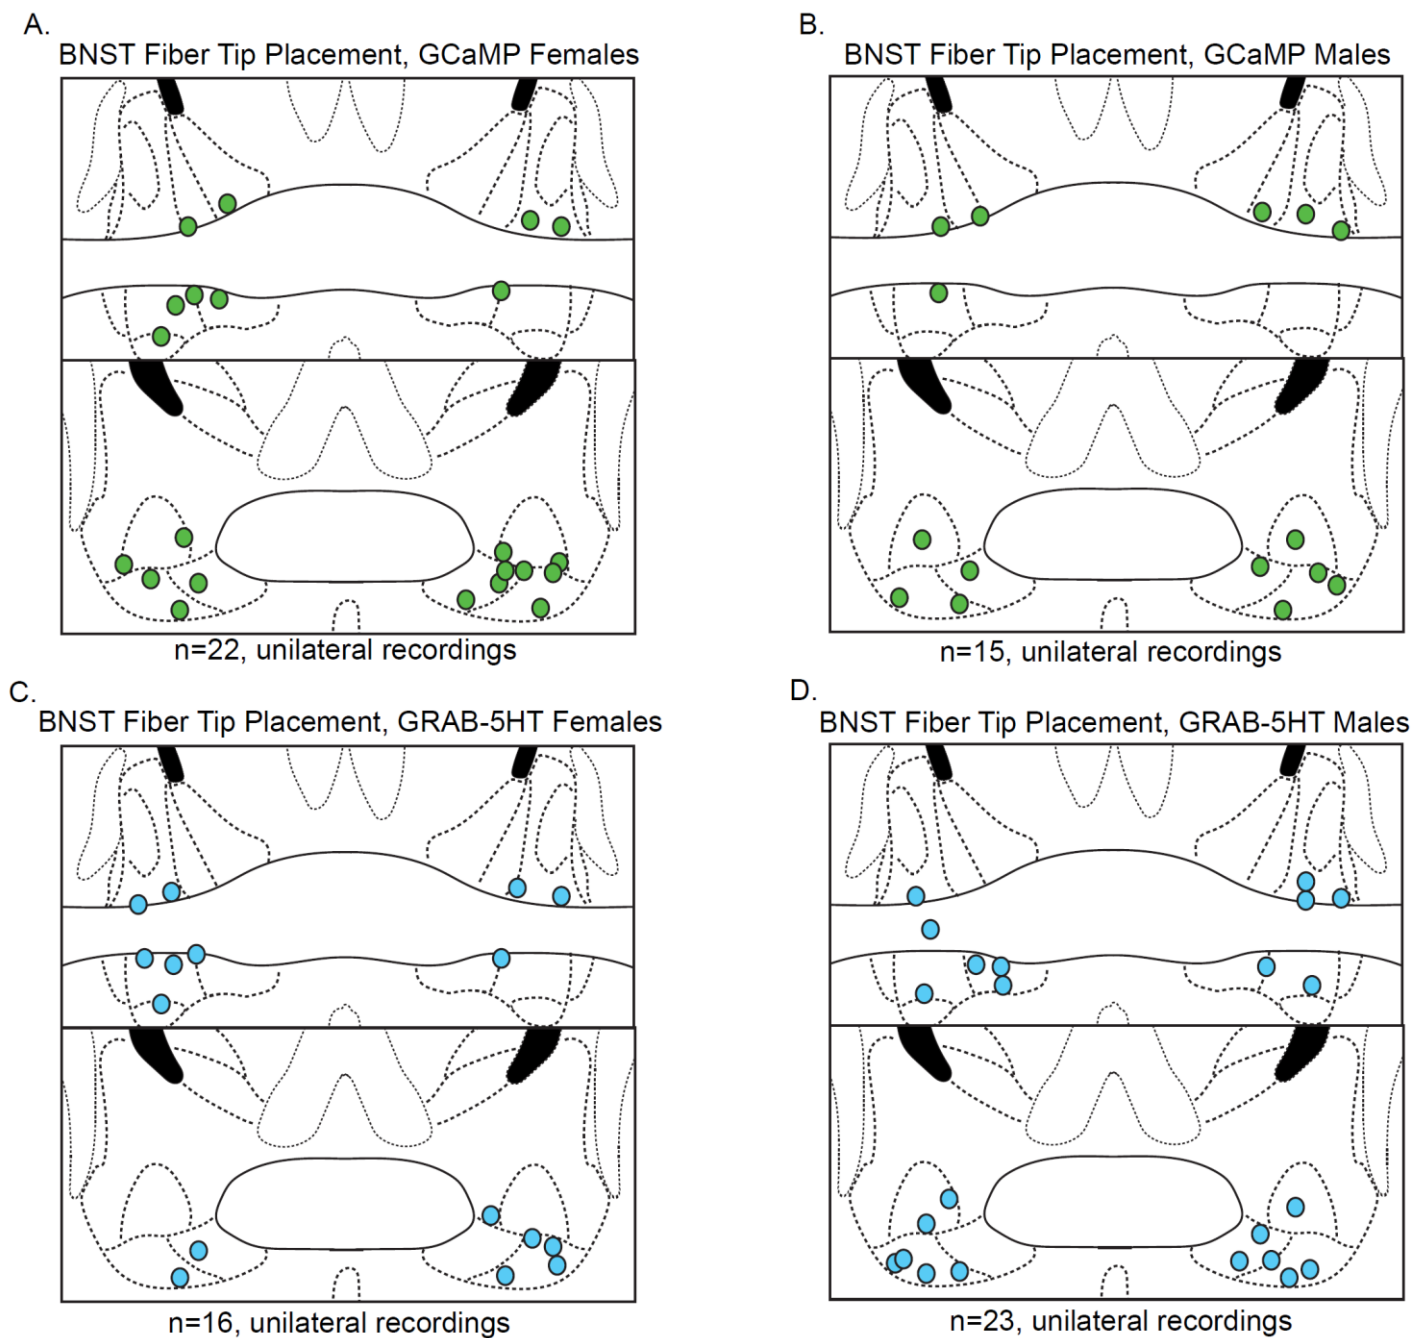

**Figure S13: BNST fiber tip placements for GCaMP and GRAB-5HT experiments. A, BNST GCaMP females. B, BNST GCaMP males. C, BNST GRAB-5HT females. D, BNST GRAB-5HT males.**

A. 2c BNST Gq DREADD Infections- Females

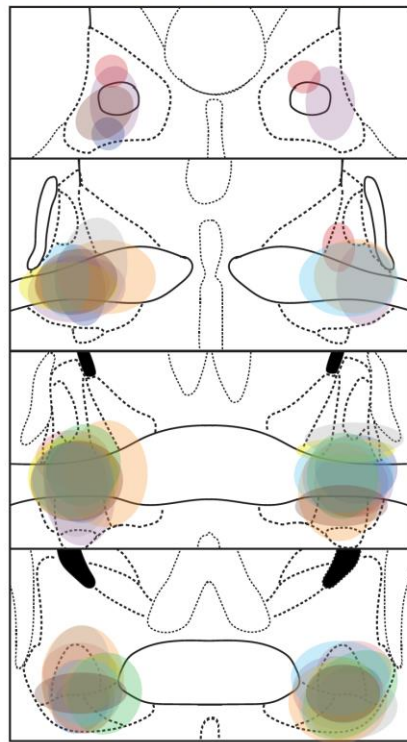

n=9, bilateral injections

B. 2c BNST Gq DREADD Infections- Males

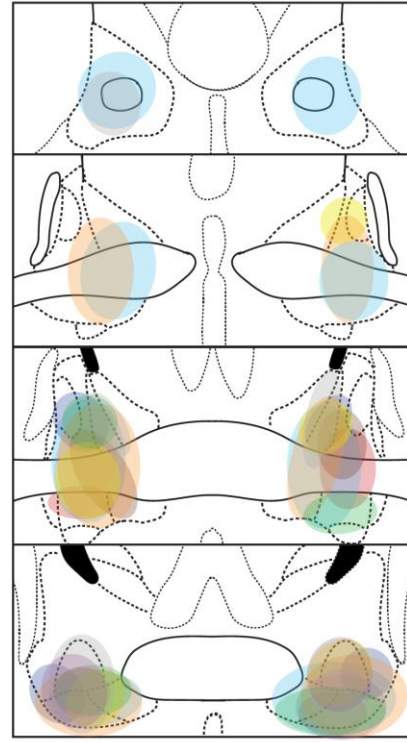

n=8, bilateral injections

C. 2c BNST Gi DREADD Infections- Females

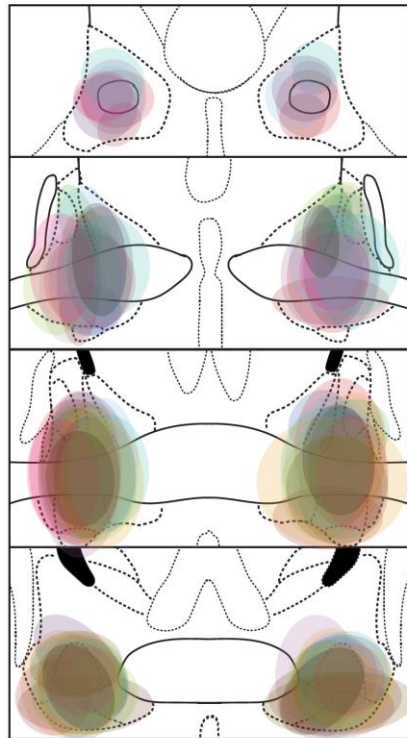

n=18, bilateral injections

D. 2c BNST Gi DREADD Infections- Males

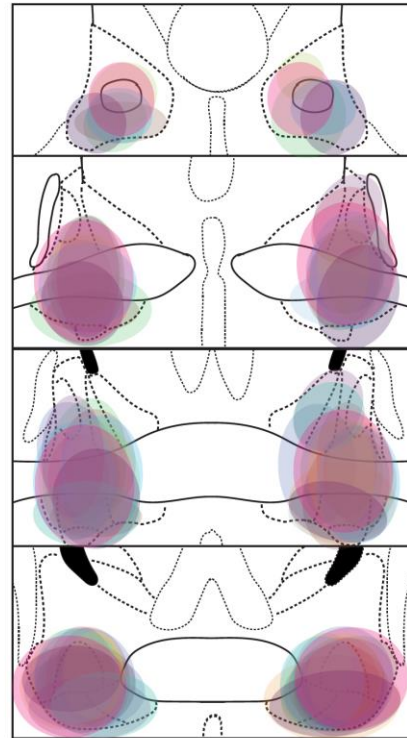

n=15, bilateral injections

**Figure S14: BNST DREADD viral spread (AAV-hSyn-DIO-hM3Dq or -hM4Di).** A, BNST Gq females. B, BNST Gq males. C, BNST Gi females. D, BNST Gi males. Each unique color represents the viral spread for a single animal across the anterior-posterior axis of the BNST.



A. 2c Deletion BNST Infections- Females

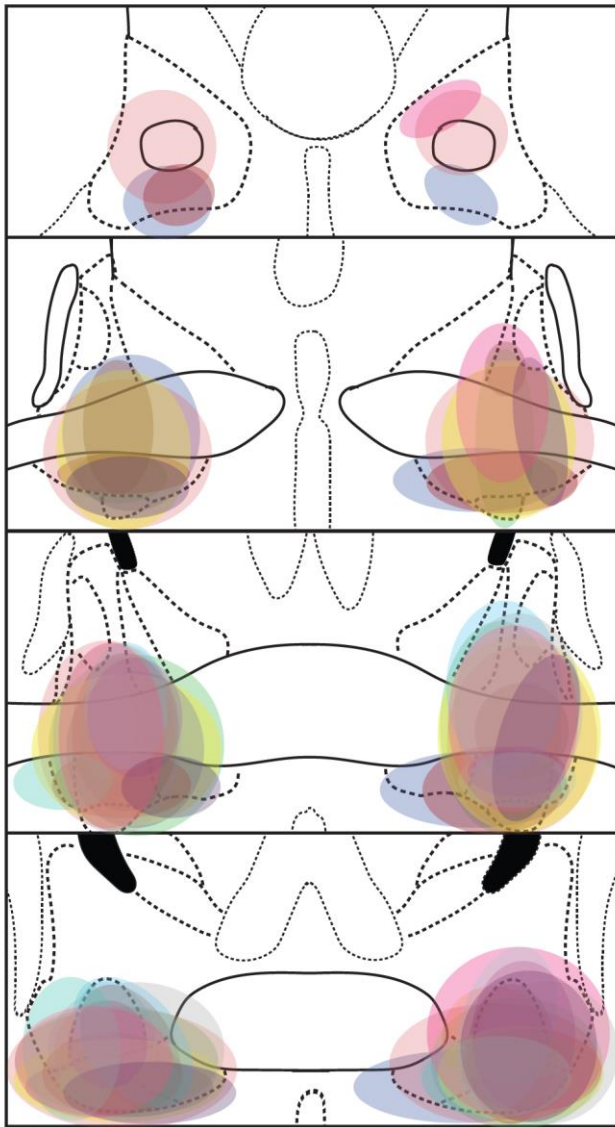

n=16, bilateral injections

B. 2c Deletion BNST Infections- Males

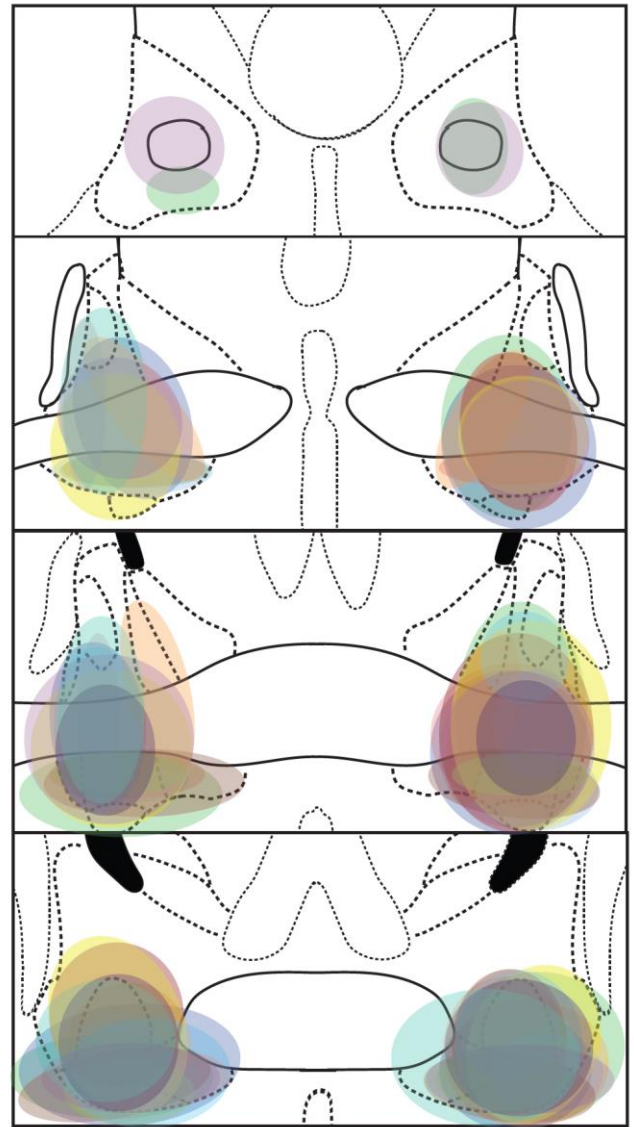

n=14, bilateral injections

**Figure S15: BNST 5HT<sub>2c</sub> deletion viral spread (AAV-Cre-GFP).** A, BNST females. B, BNST males. Each unique color represents viral spread for a single animal across the anterior-posterior axis of the BNST.

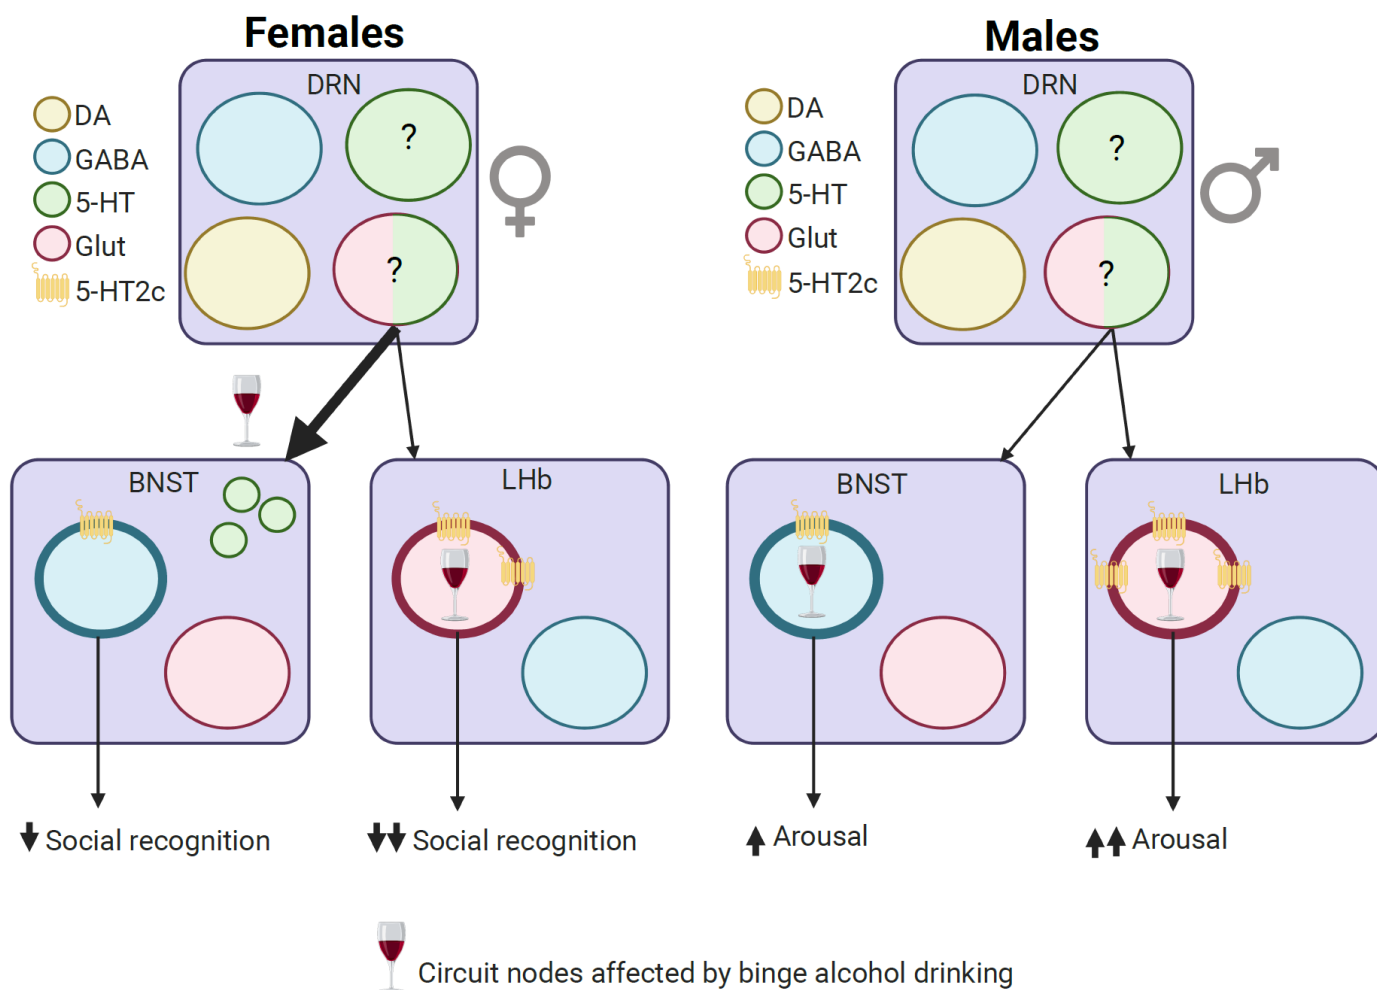

**Figure S16: Summary of binge alcohol effects on DRN-BNST and DRN-LHb circuitry.** Single 5-HT neurons in the DRN project to both BNST and LHb. In females, binge alcohol consumption increases 5-HT release in the BNST upon social interaction, decreases BNST<sub>5HT<sub>2c</sub></sub> excitability in slice, and increases medial LHb<sub>5HT<sub>2c</sub></sub> excitability in slice. 5HT<sub>2c</sub> in the BNST and the LHb partially regulate social recognition deficits induced by alcohol, but excessive activity of LHb<sub>5HT<sub>2c</sub></sub> predominantly drives alcohol-induced social recognition deficits in females. In males, binge alcohol consumption increases LHb<sub>5HT<sub>2c</sub></sub> and BNST<sub>5HT<sub>2c</sub></sub> activity upon acoustic startle delivery, increases LHb<sub>5HT<sub>2c</sub></sub> excitability in slice, and increases 5HT<sub>2c</sub> expression in the LHb. 5HT<sub>2c</sub> in the BNST partially regulates arousal disturbances induced by alcohol, but excessive activity of LHb<sub>5HT<sub>2c</sub></sub> is the primary causal mechanism driving this effect. Created with Biorender.com.
